# Supplementary material for: Acute net stress of young adult zebrafish (Danio rerio) is not sufficient to increase anxiety-like behavior and whole-body cortisol
Source: PeerJ. 2019 Aug 7;7:e7469. doi: 10.7717/peerj.7469 (PMC6689218; doi:10.7717/peerj.7469)
Supplement: Data S1 — The first two sheets contains all raw data from the behavioral and cortisol analyses from Experiment 1 (novel tank test). The second two sheets contains all raw data from the behavioral and cortisol analyses from Experiment 2 (light/dark preference test). The right-hand columns in the first and third sheets indicate if values were excluded and the rationale for excluding them from analyses. [file peerj-07-7469-s001.xlsx]

## Sheet: Novel Tank Test (Exp 1)
Fish Number	Acute Treatment	Total distance	Mean speed	Resting time	Time in bottom	Distance in bottom	Time in top	Distance in top	Entries to top	Cortisol
1	30s net stress									6.72108
2	None	1208.22	6.43996	39.8	312.333	918.784	47.6667	289.438	23	19.2376		*11, 12, and 18 excluded from cortisol due to errors with extraction procedure
3	30s net stress	1458.09	5.98085	10.8	173.6	747.356	185.467	710.732	37	15.4861		*1 and 19 excluded from behavior due to incomplete video files
4	None	1161.26	5.19576	17.6333	220.3	713.075	139.7	448.183	19	14.1803
5	30s net stress	712.296	3.96676	82.4333	257.967	404.646	102.033	307.65	21	14.3251
6	None	284.748	8.52136	308.267	291.467	199.114	68.1667	85.6342	8	31.8545
7	30s net stress	1333.23	6.94009	71.7667	352.6	1241.53	7.4	91.7027	8	17.906
8	None	916.865	7.25225	124.233	357.967	864.168	1.63333	52.6968	6	18.0382
9	30s net stress	1167.6	6.93196	84.8	355.633	1137.18	4.36667	30.4289	6	13.349
10	None	2135.48	10.5211	99	312.833	2035.77	47.1667	99.7161	9	4.09379
11	None	356.965	2.87237	139.839	357.764	355.038	2.002	1.92751	1
12	30s net stress	104.581	1.73057	199.953	346.72	98.4125	13.2799	6.16892	6
13	None	410.399	4.82653	259.099	226.8	377.762	132.632	32.6365	7	8.77998
14	30s net stress	1248.43	5.2492	19.6854	340.247	1206.76	19.6863	41.6712	5	8.75285
15	None	206.196	5.46661	273.046	299.052	158.799	60.6474	47.3974	6	13.9185
16	30s net stress	142.105	4.30819	341.782	173.681	116.58	185.919	25.5243	8	34.739
17	None	189.375	5.33566	288.595	309.616	173.027	50.3837	16.3476	8	17.935
18	30s net stress	427.813	4.67513	168.374	338.212	382.546	21.7884	45.2669	7
19	None									18.3748
20	30s net stress	698.2	4.15657	87.1464	306.547	539.513	52.052	158.687	15	21.3707

## Sheet: NTT (Exp 1) 1 min bins
Total distance									Mean Speed									Resting time
Treatment	Subject	1	2	3	4	5	6		Treatment	Subject	1	2	3	4	5	6		Treatment	Subject	1	2	3	4	5	6
Control	Fish 02	218.451	300.026	277.063	134.143	124.164	154.375		Control	Fish 02	9.99014	10.0232	6.88641	3.91088	3.592	4.23718		Control	Fish 02	22.4333	7.7	3.5	1.33333	3.43334	1.4
Stress	Fish 03	287.739	344.745	277.093	183.313	197.754	167.444		Stress	Fish 03	7.11639	7.67806	6.41914	5.06389	4.95211	4.65553		Stress	Fish 03	0.933334	1.13333	2.36667	1.9	0.966667	3.5
Control	Fish 04	295.898	241.971	155.729	145.1	201.832	120.729		Control	Fish 04	7.09587	6.10524	4.26264	4.4784	4.86342	4.36897		Control	Fish 04	4	7.1	1.1	2.56667	1.76667	1.1
Stress	Fish 05	7.46199	120.616	166.629	151.968	140.828	124.794		Stress	Fish 05	1.42586	6.50803	4.53208	4.06331	3.71251	3.55875		Stress	Fish 05	54.7667	16.5333	3.9	2.26667	2.5	2.46666
Control	Fish 06	54.6009	87.5519	90.1005	0	52.4945	0		Control	Fish 06	12.504	15.9185	7.1132	0	15.5924	0		Control	Fish 06	54.4333	50.1	36.9333	58.9667	47.8333	60
Stress	Fish 07	545.438	24.7121	332.942	200.786	93.4634	135.889		Stress	Fish 07	12.1569	4.38676	8.52968	6.1528	5.73395	4.68046		Stress	Fish 07	0.200001	50.1	2.9	4.63333	10	3.93333
Control	Fish 08	41.4216	87.6699	265.258	199.757	126.134	196.624		Control	Fish 08	8.62949	12.4649	6.77255	5.16168	5.29235	5.19253		Control	Fish 08	53.7	49.1667	2.83333	6.7	9.6	2.23333
Stress	Fish 09	236.903	220.298	238.194	156.315	185.11	130.785		Stress	Fish 09	8.62511	9.99841	7.09614	5.08617	6.07581	4.71014		Stress	Fish 09	15.4667	22.3667	12.2333	18.6	1.7	14.4333
Control	Fish 10	104.061	340.458	420.681	542.81	382.764	344.71		Control	Fish 10	13.5144	12.3653	12.8256	9.8633	7.65018	6.90801		Control	Fish 10	50.2667	26.4667	21.6667	0.166666	0.166666	0.266666
Control	Fish 11	39.5375	46.8807	109.474	75.8118	44.3764	40.8847		Control	Fish 11	2.88165	2.40585	3.35954	3.22281	2.6232	2.7412		Control	Fish 11	33.2666	27.8211	9.29583	13.2597	29.4361	26.7598
Stress	Fish 12	6.11786	0	16.3077	17.6254	28.7336	35.7967		Stress	Fish 12	1.01862	0	2.96208	1.60071	2.88009	1.92191		Stress	Fish 12	38.7454	60	46.8333	18.0979	26.8002	9.47583
Control	Fish 13	163.823	93.2805	0	52.9813	100.314	0		Control	Fish 13	12.5827	4.83671	0	6.35631	5.18348	0		Control	Fish 13	41.0744	31.8385	60	48.9954	17.1906	60
Stress	Fish 14	154.425	170.097	255.677	251.873	217.12	199.24		Stress	Fish 14	4.3985	4.31504	6.65967	5.44317	5.08364	5.59516		Stress	Fish 14	5.47213	3.43003	6.29283	0.4803	0.740499	3.26963
Control	Fish 15	85.7589	25.8275	33.5861	0	22.0581	38.9657		Control	Fish 15	10.6207	4.30029	12.4269	0	1.83634	3.61549		Control	Fish 15	50.0234	48.9556	54.1942	51.0577	34.3744	34.4411
Stress	Fish 16	112.025	29.3029	0.0368	0	0	0.740085		Stress	Fish 16	19.2953	5.7777	0.0367632	0	0	0.739346		Stress	Fish 16	51.1912	52.5926	58.999	60	60	58.999
Control	Fish 17	10.4637	47.1487	26.2263	0	95.9122	9.62397		Control	Fish 17	10.4532	2.80366	8.87082	0	8.28383	1.60239		Control	Fish 17	57.3974	30.6906	53.7736	56.997	37.0104	52.7261
Stress	Fish 18	160.667	16.9564	45.0999	49.3947	80.4709	75.224		Stress	Fish 18	12.0681	1.69394	5.21871	2.53921	3.63753	2.89327		Stress	Fish 18	43.7838	43.737	39.6929	12.4589	15.3551	13.3464
Stress	Fish 20	163.214	124.203	109.754	81.6009	159.104	60.3238		Stress	Fish 20	7.53703	4.03728	3.81325	3.50873	4.00029	2.04283		Stress	Fish 20	30.5305	11.8718	11.6649	14.321	2.8426	15.9156
Total time in bottom									Distance in bottom									Time in top
Treatment	Subject	1	2	3	4	5	6		Treatment	Subject	1	2	3	4	5	6		Treatment	Subject	1	2	3	4	5	6
Control	Fish 02	53.5333	44.5333	43.9	54.0333	57.8667	58.4667		Control	Fish 02	110.19	187.36	232.84	120.883	116.488	151.023		Control	Fish 02	6.46667	15.4667	16.1	5.96667	2.13333	1.53333
Stress	Fish 03	35.4333	22.4667	31.2	42.0667	24.3	18.1333		Stress	Fish 03	173.866	140.685	166.06	122.396	91.356	52.9929		Stress	Fish 03	23.6333	37.5333	28.8	17.9333	35.7	41.8667
Control	Fish 04	4.03334	21.3	50.2667	46.3	39.1	59.3		Control	Fish 04	98.8161	126.741	143.131	108.354	118.716	117.317		Control	Fish 04	55.9667	38.7	9.73333	13.7	20.9	0.7
Stress	Fish 05	50.7667	56.8667	57.6333	27.3667	27.7667	37.5667		Stress	Fish 05	6.73844	64.9648	155.714	58.2551	54.6854	64.2879		Stress	Fish 05	9.23333	3.13333	2.36667	32.6333	32.2333	22.4333
Control	Fish 06	32.3333	26.8333	52.3	60	60	60		Control	Fish 06	31.1493	38.8803	76.5896	0	52.4945	0		Control	Fish 06	27.3	33.1667	7.7	0	0	0
Stress	Fish 07	56.3667	56.9667	59.5	60	60	59.7667		Stress	Fish 07	471.076	24.0139	316.3	200.786	93.4634	135.889		Stress	Fish 07	3.63333	3.03333	0.5	0	0	0.233333
Control	Fish 08	59.1333	59.5333	60	60	59.4333	59.8667		Control	Fish 08	18.6349	57.7598	265.258	199.757	126.134	196.624		Control	Fish 08	0.466667	0.466667	0	0	0.566667	0.133333
Stress	Fish 09	57.6333	58	60	60	60	60		Stress	Fish 09	221.458	205.315	238.194	156.315	185.11	130.785		Stress	Fish 09	2.36667	2	0	0	0	0
Control	Fish 10	31.4333	49.5	60	60	60	51.9		Control	Fish 10	94.3267	316.086	420.681	542.81	382.764	279.1		Control	Fish 10	28.5667	10.5	0	0	0	8.1
Control	Fish 11	57.7644	60	60	60	60	60		Control	Fish 11	37.61	46.8807	109.474	75.8118	44.3764	40.8847		Control	Fish 11	2.002	0	0	0	0	0
Stress	Fish 12	59.5662	60	58.0647	60	60	49.0891		Stress	Fish 12	6.11786	0	15.6774	17.6254	28.7336	30.2582		Stress	Fish 12	0.433767	0	1.93527	0	0	10.9109
Control	Fish 13	58.8989	35.9959	0	11.9055	60	60		Control	Fish 13	139.821	84.6462	0	52.9813	100.314	0		Control	Fish 13	0.533867	24.0041	60	48.0945	0	0
Stress	Fish 14	50.2236	60	60	60	54.1275	55.8959		Stress	Fish 14	141.616	170.097	255.677	251.873	194.631	192.867		Stress	Fish 14	9.7097	0	0	0	5.87253	4.1041
Control	Fish 15	23.2299	54.1275	41.6949	60	60	60		Control	Fish 15	69.2259	7.1092	21.44	0	22.0581	38.9657		Control	Fish 15	36.4698	5.87253	18.3051	0	0	0
Stress	Fish 16	59.3327	41.7484	20.774	0	0	51.8255		Stress	Fish 16	86.8774	28.963	0	0	0	0.740085		Stress	Fish 16	0.266933	18.2516	39.226	60	60	8.17453
Control	Fish 17	59.8665	60	60	41.6214	29.1294	58.999		Control	Fish 17	10.4637	47.1487	26.2263	0	83.4164	5.77208		Control	Fish 17	0.133466	0	0	18.3786	30.8706	1.001
Stress	Fish 18	54.9215	48.7955	54.4945	60	60	60		Stress	Fish 18	144.871	13.2215	19.3637	49.3947	80.4709	75.224		Stress	Fish 18	5.07847	11.2045	5.5055	0	0	0
Stress	Fish 20	53.2266	48.8555	50.4369	41.8687	55.629	56.5299		Stress	Fish 20	135.207	94.3567	77.5727	41.1972	142.037	49.142		Stress	Fish 20	5.37203	11.1445	9.56307	18.1313	4.37103	3.47013
Distance in top									Entries to top
Treatment	Subject	1	2	3	4	5	6		Treatment	Subject	1	2	3	4	5	6
Control	Fish 02	108.261	112.666	44.2234	13.2598	7.67586	3.35176		Control	Fish 02	9	6	4	2	1	1
Stress	Fish 03	113.874	204.06	111.033	60.9172	106.398	114.451		Stress	Fish 03	6	5	7	4	8	7
Control	Fish 04	197.082	115.23	12.5972	36.7465	83.1156	3.41193		Control	Fish 04	3	4	3	4	4	1
Stress	Fish 05	0.723552	55.6508	10.9154	93.7125	86.1425	60.5057		Stress	Fish 05	2	4	1	6	3	5
Control	Fish 06	23.4516	48.6717	13.5109	0	0	0		Control	Fish 06	2	5	1	0	0	0
Stress	Fish 07	74.3623	0.698202	16.6422	0	0	0		Stress	Fish 07	5	1	1	0	0	1
Control	Fish 08	22.7867	29.9101	0	0	0	0		Control	Fish 08	1	3	0	0	1	1
Stress	Fish 09	15.4455	14.9834	0	0	0	0		Stress	Fish 09	4	2	0	0	0	0
Control	Fish 10	9.73427	24.3719	0	0	0	65.61		Control	Fish 10	2	1	0	0	0	6
Control	Fish 11	1.92751	0	0	0	0	0		Control	Fish 11	1	0	0	0	0	0
Stress	Fish 12	0	0	0.630369	0	0	5.53855		Stress	Fish 12	1	0	2	0	0	3
Control	Fish 13	24.0023	8.63424	0	0	0	0		Control	Fish 13	3	2	1	1	0	0
Stress	Fish 14	12.8089	0	0	0	22.4897	6.37266		Stress	Fish 14	3	0	0	0	1	1
Control	Fish 15	16.5331	18.7183	12.146	0	0	0		Control	Fish 15	3	1	2	0	0	0
Stress	Fish 16	25.1475	0.339958	0.0368	0	0	0		Stress	Fish 16	1	3	1	1	1	1
Control	Fish 17	0	0	0	0	12.4957	3.85189		Control	Fish 17	1	0	0	1	5	1
Stress	Fish 18	15.7958	3.73492	25.7362	0	0	0		Stress	Fish 18	3	2	2	0	0	0
Stress	Fish 20	28.0067	29.8463	32.1812	40.4038	17.067	11.1818		Stress	Fish 20	4	2	4	3	1	1

## Sheet: Light-Dark Test (Exp 2)
Fish Number	Acute stress	Time in light zone (sec)	Total entries to zone	Total time immobile (s)	Total distance (cm)	Average velocity (cm/s)	Cortisol (ng/g body weight)
Fish 01	None	582.537	151	2.10206	3248.39	5.393	25.7402
Fish 02	30s net stress	485.442	143	1.96859	3018.47	5.86159	22.9717		*14 excluded from cortisol due to errors with extraction procedure
Fish 03	None	659.079	183	19.1854	4415.81	6.8998	10.9347		*20 excluded from behavior due to incomplete video file
Fish 04	30s net stress	821.471	184	2.36899	5221.48	6.64063	26.5291
Fish 05	None	680.623	229	1.20118	4150.95	6.37686	27.4953
Fish 06	30s net stress	605.167	71	122.167	2482.49	8.40409	9.20839
Fish 07	None	530.4	95	131.667	1902.24	9.45743	17.2781
Fish 08	30s net stress	691.9	69	15.3667	2517.57	6.99809	24.5812
Fish 09	None	531.033	78	3.33333	3090.32	8.3336	32.7731
Fish 10	30s net stress	600.967	138	53.3	3389.2	11.5452	47.7651
Fish 11	30s net stress	277.4	150	1.93333	3307.44	16.7865	29.5658
Fish 12	None	173.733	131	39.1333	655.442	10.7926	22.0376
Fish 13	30s net stress	128.333	52	55.9667	261.141	8.59308	13.7105
Fish 14	None	762.133	75	208.067	3344.02	14.4711
Fish 15	30s net stress	272.433	87	53.5	541.501	6.65891	32.685
Fish 16	None	42.6667	60	0.866665	378.327	10.2079	18.5167
Fish 17	30s net stress	193	50	94.7333	132.221	4.92384	24.6406
Fish 18	None	272.9	105	26.9667	751.643	5.99414	21.341
Fish 19	30s net stress	80.8	85	25.5667	439.123	11.5955	20.6455
Fish 20	None						38.3056

## Sheet: LD Test (Exp 2) 3 min bins
Time in light zone (sec)								Entries to light								Time Immobile (sec)
Treatment	Fish number	Min 1-3	Min 4-6	Min 7-9	Min 10-12	Min 13-15		Treatment	Fish number	Min 1-3	Min 4-6	Min 7-9	Min 10-12	Min 13-15		Treatment	Fish number	Min 1-3	Min 4-6	Min 7-9	Min 10-12	Min 13-15
Control	Fish 01	145.566	121.743	132.816	100.832	81.5799		Control	Fish 01	24	29	36	46	16		Control	Fish 01	0	0	0	0	2.10206
Stress	Fish 02	112.067	118.425	68.8007	89.3208	96.8281		Stress	Fish 02	26	34	22	18	43		Stress	Fish 02	0.567222	0.934248	0	0	0.467124
Control	Fish 03	172.726	117.305	144.198	120.28	104.569		Control	Fish 03	19	31	48	54	31		Control	Fish 03	19.1854	0	0	0	0
Stress	Fish 04	168.289	168.756	169.19	159.451	155.786		Stress	Fish 04	40	37	44	37	26		Stress	Fish 04	0.16683	0	0	0	2.20216
Control	Fish 05	167.497	115.294	117.601	103.401	176.83		Control	Fish 05	22	89	64	49	5		Control	Fish 05	0.700686	0.50049	0	0	0
Stress	Fish 06	165.1	123.467	125.3	94.3667	96.9333		Stress	Fish 06	17	15	7	7	25		Stress	Fish 06	97.9667	18.5667	2.13333	0.933333	2.56667
Control	Fish 07	132.033	102.5	69.1333	123.533	103.2		Control	Fish 07	27	6	14	11	37		Control	Fish 07	90.0667	35.4333	1.56667	3.03333	1.56667
Stress	Fish 08	109.167	142.767	131.433	167.1	141.433		Stress	Fish 08	24	8	8	5	24		Stress	Fish 08	1.23333	2.16667	1.16667	6.16667	4.63333
Control	Fish 09	117	160.233	56.9667	114.067	82.7667		Control	Fish 09	16	10	7	18	27		Control	Fish 09	1.6	0.8	0.1	0.7	0.133333
Stress	Fish 10	155.767	170.433	81.3667	93.7667	99.6333		Stress	Fish 10	28	9	7	29	65		Stress	Fish 10	34.9333	11.9667	1.9	3.03334	1.46667
Stress	Fish 11	131	46.9667	52.3	17.8333	29.3		Stress	Fish 11	15	38	43	8	46		Stress	Fish 11	1.03333	0.499999	0	0.3	0.1
Control	Fish 12	39.8	44.9333	26.7	57.9	4.4		Control	Fish 12	50	33	13	21	14		Control	Fish 12	6.36667	4.2	10.7	17.4333	0.433333
Stress	Fish 13	39.7333	38.4333	9.86666	21.5667	18.7333		Stress	Fish 13	17	9	5	7	14		Stress	Fish 13	21.3667	25.2667	1.1	4.43334	3.8
Control	Fish 14	109.667	170.667	162	171.533	148.267		Control	Fish 14	22	10	15	16	12		Control	Fish 14	31.7667	38.2	37.0333	52	49.0667
Stress	Fish 15	38.3667	74.2667	61.7333	85.6333	12.4333		Stress	Fish 15	23	19	15	19	11		Stress	Fish 15	15.8	10.2333	12.3667	13.7	1.4
Control	Fish 16	11	16.2333	2.3	2.1	11.0333		Control	Fish 16	31	11	3	4	11		Control	Fish 16	0.299999	0	0	0	0.566666
Stress	Fish 17	16.3333	32.6	17.4333	32.2	94.4333		Stress	Fish 17	10	11	9	11	9		Stress	Fish 17	0.1	20.4333	8.5	13.7667	51.9333
Control	Fish 18	42.0667	98.2667	53.5333	46.1333	32.9		Control	Fish 18	30	24	16	17	18		Control	Fish 18	2.86667	11.8333	6.03333	3.96667	2.26667
Stress	Fish 19	11.6333	13.3333	22.9333	15.6	17.3		Stress	Fish 19	14	18	16	12	25		Stress	Fish 19	3	3.53333	9.2	5.86667	3.96667
Total distance (cm)								Mean speed (cm/s)
Treatment	Fish number	Min 1-3	Min 4-6	Min 7-9	Min 10-12	Min 13-15		Treatment	Fish number	Min 1-3	Min 4-6	Min 7-9	Min 10-12	Min 13-15		*20 excluded from behavior due to incomplete video file
Control	Fish 01	1610.03	445.246	448.691	445.054	299.369		Control	Fish 01	10.6207	3.86196	3.51614	4.67085	4.29532
Stress	Fish 02	1355.46	535.84	289.995	344.556	492.617		Stress	Fish 02	9.95626	5.00468	4.47059	3.99737	5.87904
Control	Fish 03	1464.23	699.446	896.821	679.123	676.185		Control	Fish 03	8.43206	6.30436	6.64583	6.12386	6.99292
Stress	Fish 04	1442.21	838.26	1002.6	926.769	1011.64		Stress	Fish 04	8.77443	5.15487	6.26578	6.12772	6.88037
Control	Fish 05	1488.1	726.225	640.017	514.732	781.873		Control	Fish 05	8.84081	7.35387	6.06579	5.17606	4.44776
Stress	Fish 06	526.128	598.479	317.426	300.462	739.997		Stress	Fish 06	10.7934	12.0837	4.12716	4.62624	10.39
Control	Fish 07	895.291	81.3376	172.381	239.724	513.502		Control	Fish 07	25.2654	3.17697	4.639	3.68913	8.42312
Stress	Fish 08	627.25	420.659	336.359	332.982	800.318		Stress	Fish 08	9.56388	5.06754	4.99839	4.51676	10.8439
Control	Fish 09	793.262	815.643	323.29	597.066	561.063		Control	Fish 09	9.37724	7.65114	8.32918	7.7792	8.53122
Stress	Fish 10	919.031	354.902	93.4093	392.7	1629.16		Stress	Fish 10	16.1526	5.93456	2.82372	8.83171	23.9835
Stress	Fish 11	613.916	716.423	999.604	73.6125	903.88		Stress	Fish 11	8.01918	19.964	18.2197	7.2651	27.2906
Control	Fish 12	380.978	72.773	41.0225	68.0258	92.6426		Control	Fish 12	11.8761	7.43447	4.97847	2.76427	26.9097
Stress	Fish 13	120.388	12.1345	12.6198	16.5457	99.4536		Stress	Fish 13	6.56553	1.51411	2.08019	1.20347	29.4311
Control	Fish 14	1661.85	173.496	321.126	552.379	635.164		Control	Fish 14	35.0615	5.79328	8.97424	11.3891	11.1373
Stress	Fish 15	260.031	75.7297	45.9394	99.8585	59.9424		Stress	Fish 15	12.9365	3.22418	2.82026	3.50406	10.8096
Control	Fish 16	163.553	76.694	22.1702	22.2523	93.6572		Control	Fish 16	10.1502	7.28679	14.4896	9.29659	10.94
Stress	Fish 17	3.98683	20.6453	38.0643	34.2555	35.2694		Stress	Fish 17	4.12431	1.94604	8.97586	6.36812	2.67184
Control	Fish 18	112.463	250.552	115.339	182.331	90.9579		Control	Fish 18	6.51083	7.68779	4.62617	5.66511	5.02481
Stress	Fish 19	63.0666	142.166	89.1214	24.6724	120.096		Stress	Fish 19	11.6824	13.3925	8.46947	6.16409	21.6493
