# Supplementary material for: Acute net stress of young adult zebrafish ( Danio rerio ) is not sufficient to increase anxiety-like behavior and whole-body cortisol
Source: PeerJ journal article supplement (doi:10.7717/peerj.7469), 2019-08-07

**A**

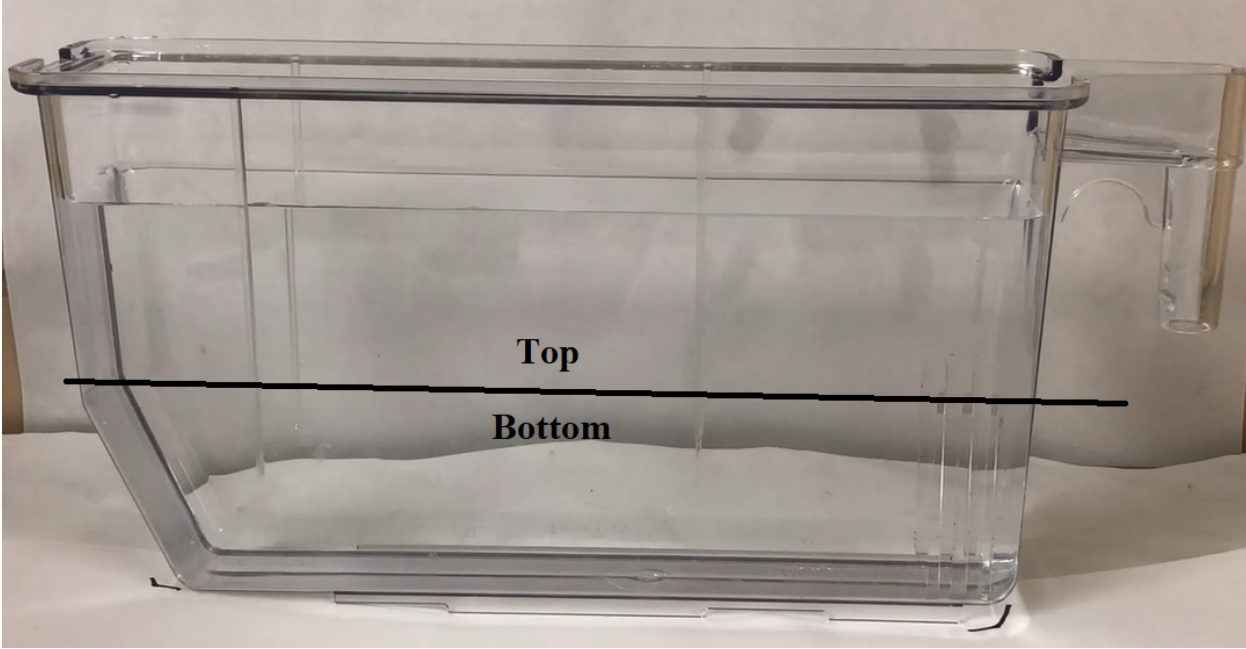

**B**

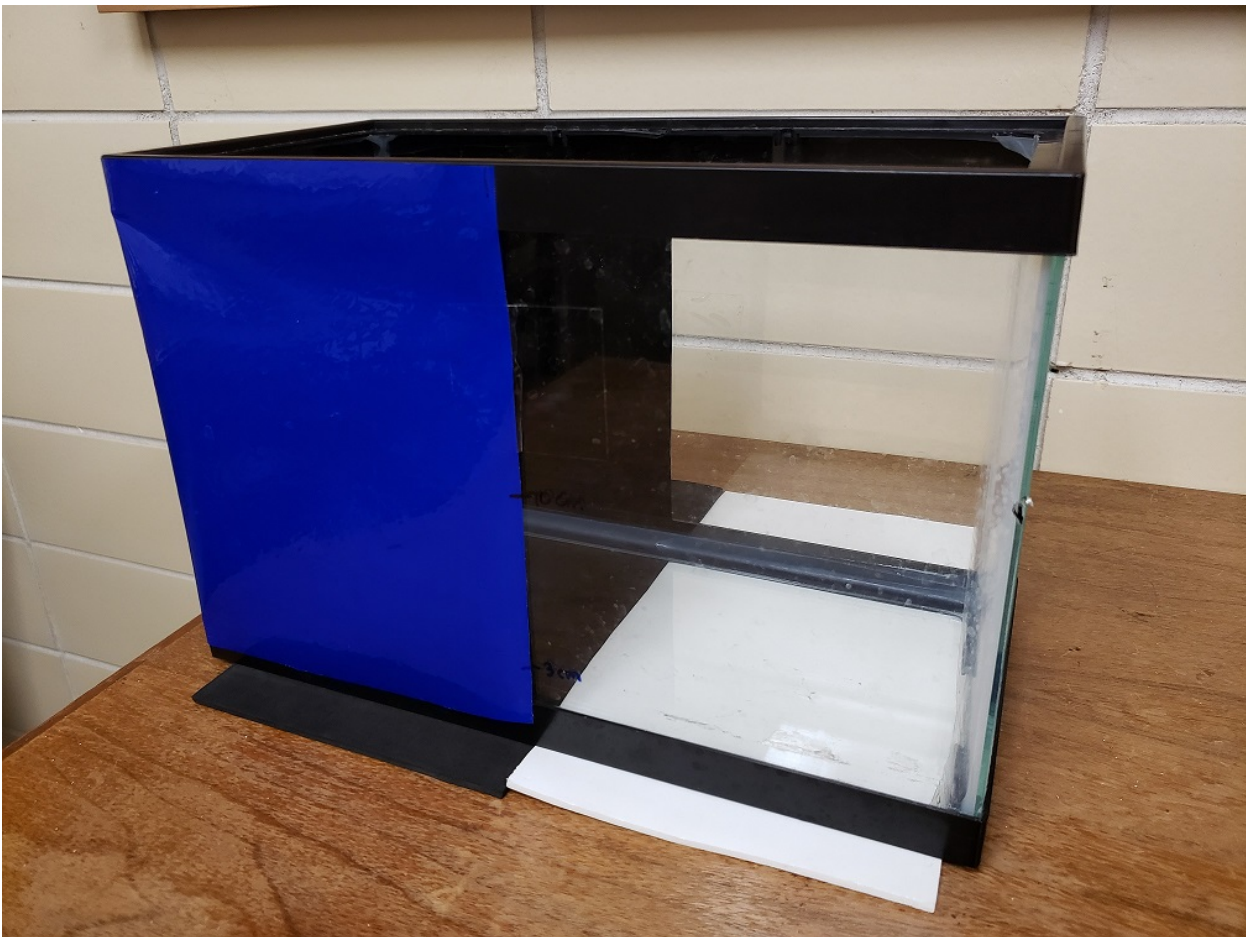

Supplement: Supplementary_figure.pdf [file Supplementary_figure.pdf]
